1 Indirect effects of territorial neighbors on the timing of spring  
2 breeding may counteract changes in selection in North  
3 American red squirrels

4

5 David N. Fisher<sup>1\*</sup>, Alastair J. Wilson<sup>2</sup>, Stan Boutin<sup>3</sup>, Ben Dantzer<sup>4,5</sup>, Jeffrey E. Lane<sup>6</sup>, David W.  
6 Coltman<sup>3</sup>, Jamie C. Gorrell<sup>7</sup>, and Andrew G. McAdam<sup>1</sup>

7 1. Department for Integrative Biology, University of Guelph, Guelph, Ontario N1G 2W1, Canada

8 2. Centre for Ecology and Conservation, University of Exeter, Penryn, Cornwall, TR10 9FE, UK

9 3. Department of Biological Sciences, University of Alberta, Edmonton, Alberta T6G 2E9,  
10 Canada

11 4. Department of Psychology, University of Michigan, Ann Arbor, Michigan 48109-1043, USA

12 5. Department of Ecology and Evolutionary Biology, University of Michigan, Ann Arbor,  
13 Michigan 48109-1043, USA

14 6. Department of Biology, University of Saskatchewan, Saskatoon, Saskatchewan S7N 5E2,  
15 Canada

16 7. Biology Department, University of Vancouver Island, Nanaimo, British Columbia V9R 5W4,  
17 Canada

18

19 \*corresponding author: [davidnfisher@hotmail.com](mailto:davidnfisher@hotmail.com)

20

21

22 **Abstract**

23 Organisms can affect one another's phenotypes when they socially interact. Indirect genetic effects  
24 occur when an individual's phenotype is affected by genes expressed in another individual. These  
25 heritable effects can enhance or reduce adaptive potential, thereby accelerating or reversing  
26 evolutionary change. Quantifying these social effects is therefore crucial for our understanding of  
27 evolution, yet estimates of indirect genetic effects in wild animals are limited to dyadic interactions.  
28 We estimated indirect phenotypic and genetic effects, and their covariance with direct effects, in  
29 North American red squirrels (*Tamiasciurus hudsonicus*) living in an array of territories of varying  
30 spatial proximity. Additionally, we estimated variance parameters and the strength of selection at  
31 high and low population densities. Social effects of neighbors on date of spring breeding were weak  
32 at low population densities, but stronger at high population densities. Although indirect phenotypic  
33 effects were detected, the genetic component to these was not statistically significant. Nevertheless,

34 the estimated effect size was large enough to suggest that indirect genetic effects would alter  
35 evolutionary change, giving less change at high densities despite stronger selection. The (uncertain)  
36 potential for indirect genetic effects to alter evolution suggests that they have potentially important  
37 consequences for any natural systems where organisms interact.

38 **Key words:** evolution, indirect genetic effects, KRSP, selection, social interactions, *Tamiasciurus*

39

## 40 Introduction

41

42 An individual's phenotype is influenced by both its genotype and the environment it experiences.  
43 When organisms live in a social world, moving, mating, competing and cooperating with conspecifics  
44 (Frank 2007), the environment they experience is partly made up of the phenotypes of other  
45 individuals. If the elements of the phenotype that influence other individuals have a genetic  
46 component, then a portion of an individual's phenotype will be influenced by the genes of others  
47 (Griffing 1967). These are known as indirect genetic effects (IGEs), of which maternal genetic effects  
48 are a widely known example (Moore et al. 1997; Wolf et al. 1998; McAdam et al. 2014). With  
49 maternal genetic effects, the genes of a mother influence the traits of her offspring beyond those  
50 directly inherited (e.g. a mammal's genes affecting milk production may influence the growth rate of  
51 her offspring; (Koch 1972; María et al. 1993). In the same way, the genes affecting hunting success of  
52 an individual (so DGEs for condition) in a pack-hunting species may influence the body condition of  
53 its pack mates (an IGE). Additionally, when competing for limited resources, the genes for resource  
54 acquisition of one individual are expected to negatively influence the resource acquisition, and so  
55 resource dependent traits, of individuals with which it competes (Wilson 2014). Therefore, IGEs can  
56 be expected in almost any system where conspecifics interact with each other (McAdam et al. 2014).

57 As IGEs are heritable by definition, they contribute additional heritable variation within a  
58 population alongside direct genetic effects (DGEs; i.e. an effect on an individual's genes on its own  
59 phenotype; Moore et al. 1997; Bijma and Wade 2008). Similar to a genetic correlation between any  
60 two traits (Lande 1979; Kirkpatrick 2009), an individual's own phenotype for some focal trait and its  
61 indirect effect on that trait expressed by neighbors can be genetically correlated (a DGE-IGE  
62 correlation). When IGEs are positively correlated with DGEs, which we would expect for the trait of  
63 hunting success in the pack-hunter example above, IGEs can enhance that trait's response to  
64 directional selection. This happens because the standard response of the focal trait to selection  
65 results in a correlated evolutionary change in the social environment. This in turn causes further  
66 change in focal trait mean - in the same direction - through a plastic response to the social  
67 environment (Moore et al. 1997).

68           Conversely, if IGEs are negatively correlated with DGEs then the population response to  
69 selection can be reduced, removed, or even reversed (Bijma and Wade 2008; Wilson 2014). Negative  
70 correlations are expected for focal traits that are themselves dependent on the outcome of  
71 competition for limited resources (Wilson 2014). For instance, Wade (1976) observed a decrease in  
72 mean reproductive output across generations in flour beetles (*Tribolium castaneum*) that were  
73 under individual selection for *increased* reproduction. This was presumably due to a negative IGE-  
74 DGE correlation that caused each subsequent generation to be composed of individuals that more  
75 strongly suppressed the reproduction of others through competitive interactions. Furthermore,  
76 Costa e Silva *et al.* (2013) observed a strong negative DGE-IGE covariance for diameter at breast  
77 height in eucalyptus trees (*Eucalyptus globulus*), indicating that trees with DGEs for fast growth had  
78 IGEs that caused their neighbors to grow less. This DGE-IGE covariance nearly completely  
79 counteracted the evolutionary potential set by DGEs for this trait. This means that despite tree  
80 growth rates being heritable in the traditional sense (i.e. subject to DGEs), the total heritable  
81 variation in the population was near zero, preventing a response to selection. Estimates of DGEs  
82 alone might, therefore, provide a poor measure of the potential for a trait to respond to natural  
83 selection, yet most estimates of response to selection or evolvability in the wild only consider DGEs  
84 (Houle 1992). More specifically, to the extent to which resources are limited in nature, we might  
85 expect DGEs to consistently overestimate the adaptive potential of resource-dependent traits  
86 because of negatively covarying IGEs (Wilson 2014). As such, IGEs arising from competition  
87 represent one possible explanation for the “paradox of stasis”, in which natural selection on  
88 heritable traits often leads to stasis rather than evolutionary change (Merilä *et al.* 2001), yet IGEs are  
89 very rarely quantified in the wild.

90           To date, empirical studies of IGEs in animals have focussed on scenarios in which within  
91 group interactions can be considered (approximately) uniform, and among-group interactions are  
92 absent. This allows IGEs to be estimated from the covariance between phenotypes of group mates,  
93 provided pedigree data spanning groups are available (Bijma 2010a). This approach is well suited to  
94 dyadic interactions, but also to larger discrete groups ( $n > 2$ ) of captive animals, where all individuals  
95 within a pen are assumed to interact equally, but no interactions occur between individuals in  
96 different pens. It has now been applied in a variety of taxa, such as mussels (*Mytilus*  
97 *galloprovincialis*) (Brichette *et al.* 2001), flour beetles (*T. castaneum*) (Ellen *et al.* 2016), Nile tilapia  
98 (*Oreochromis niloticus*) (Khaw *et al.* 2016), domesticated chickens (*Gallus domesticus*) (Muir 2005;  
99 Brinker *et al.* 2015) mink (*Neovison vison*) (Alemu *et al.* 2014), and domestic rabbits (*Oryctolagus*  
100 *cuniculus*) (Piles *et al.* 2017). This work has helped establish the importance of IGEs for trait

101 evolution (see: Ellen *et al.* 2014, for a review in livestock), and has led to growing interest in studying  
102 IGEs in wild populations.

103         Studies of IGEs in free-living animal populations have however been largely confined to  
104 dyadic interactions. Here the “group” can be simply defined as the interacting pair, be that mother  
105 and offspring, a breeding pair, or antagonists in a dyadic contest. For example, Wilson *et al.* (2011)  
106 demonstrated that the tendency to win fights in wild red deer (*Cervus elaphus*) is subject to both  
107 DGEs and IGEs that are perfectly *negatively* correlated, resulting in a total heritable variation of zero.  
108 This reconciles quantitative genetic predictions with a common sense approach that sees that the  
109 tendency to win cannot evolve at the population level, as each contest must always have one winner  
110 and one loser (Wilson *et al.* 2009, 2011). Similar consequences of IGEs have been demonstrated in  
111 captive deer mice (*Peromyscus maniculatus*) (Wilson *et al.* 2009), and in contests between fighting  
112 cattle (*Bos taurus*) (Sartori and Mantovani 2013). In addition, Brommer and Rattiste (2008) showed  
113 that male common gulls (*Larus canus*) exert IGEs on the laying dates of their mate, but these effects  
114 are negatively correlated with the DGE for laying date in females, which would constrain the  
115 evolution of this trait.

116         While social processes in wild populations frequently involve interactions among more than  
117 two individuals, it is often problematic to identify and define discrete groups where  $n > 2$ . In many  
118 cases an individual will interact with multiple conspecifics, but not all at equal intensity. Some  
119 interactions are frequent or strong while other interactions are brief or weak (Lusseau *et al.* 2003;  
120 Croft *et al.* 2004, 2008). One possibility is that organisms interacting in larger groups have generally  
121 weaker indirect effects on each of their group mates, as a consequence of their phenotype being  
122 “diluted” among more group members (Muir 2005; Hadfield and Wilson 2007; Bijma 2010b).  
123 However, within a continuous population (i.e. one in which distinct groups cannot be identified) it  
124 seems likely the net effect of one individual on the phenotype of any other may depend on distance  
125 or other factors (e.g. time associating) that mediate interaction intensity or frequency (Muir 2005;  
126 Cappa and Cantet 2008). To model these situations, variation in interaction strengths can be  
127 incorporated as “dilution” or “intensity of competition” factors in IGE models (Muir 2005; Cappa and  
128 Cantet 2008; Bijma 2010b). Here we refer to “intensity of association” factors, as social interactions  
129 are not always competitive. This approach has proven useful in forestry genetics to estimate DGEs,  
130 IGEs, and their covariance, on growth traits in Eucalyptus trees (Costa e Silva *et al.* 2013, 2017). In  
131 this context, the inverse of the distance between each pair of trees was used as the intensity of  
132 association factor. The important premise here is that each focal individual has a potential indirect  
133 genetic effect on the phenotype of all its social partners, but the degree to which any particular  
134 partner experiences that effect is contingent on its distance from the focal individual. Incorporating

135 intensity of association factors should be equally useful for animal focused IGE models, as it would  
136 allow us to account for animals interacting with multiple different individuals, in groups of varying  
137 sizes, and with different individuals at different strengths; a realistic representation of social  
138 interactions in the natural world (Fisher and McAdam 2017).

139         Here we used intensity of association factors to model IGEs for the first time in a wild  
140 animal. We applied this framework to a population of North American red squirrels (*Tamiasciurus*  
141 *hudsonicus*, hereafter “red squirrels”) that have been continuously studied since 1987. We looked at  
142 a resource-dependent, but also heritable ( $h^2 = 0.14$ ) life-history trait: parturition date (the date in  
143 the spring on which a female squirrel gives birth to a litter; Réale et al. 2003; Boutin et al. 2006; Kerr  
144 et al. 2007; Lane et al. 2018), which had the potential to show IGEs. Red squirrels in this population  
145 live on individual exclusive territories based around a central cache of white spruce (*Picea glauca*)  
146 cones called a “midden”. The seeds from stored spruce cones represents their main food source  
147 during reproduction in the spring (Fletcher et al. 2013a). Individuals make territorial calls (“rattles”)  
148 to delineate territory boundaries (Lair 1990) and deter intruders (Siracusa et al. 2017) from stealing  
149 cached resources (Gerhardt 2005; Donald and Boutin 2011). Previous analyses have shown that  
150 selection favors earlier parturition dates (Réale et al. 2003), while a food supplementation  
151 experiment resulted in a significant advancement in the average timing of spring breeding (Kerr et al.  
152 2007). Note however that females can upregulate reproduction prior to a resource pulse (Boutin et  
153 al. 2006), and so typically are reproducing below capacity (Boutin et al. 2013), so may not be  
154 absolutely food limited. Still, if neighbors compete for food resources, we expect superior  
155 competitors to have access to more food and breed earlier. Conversely, competitively inferior  
156 individuals are expected to acquire less food and so breed later.

157         Population density is a key demographic parameter with which we expect IGEs to vary.  
158 Selection on birth dates is particularly strong in years of high density (Williams et al. 2014; Fisher et  
159 al. 2017; although not found in Dantzer et al. 2013). Furthermore, red squirrels respond behaviorally  
160 to both real and perceived increases in density (Dantzer et al. 2012), while mothers adaptively  
161 increase the growth rates of their offspring under high density conditions (Dantzer et al. 2013).  
162 Taken together, these findings are consistent with the expectation that, all else being equal, high  
163 density means increased competition.

164         In light of the above, we had the following aims and predictions. We expected individuals to  
165 have indirect effects on the parturition dates of their neighbors, and that a portion of this indirect  
166 effect would be heritable, and therefore an IGE (McAdam et al. 2014; Wilson 2014). As we expect  
167 there to be competition for limited resources, we expected the DGE-IGE covariance to be negative  
168 (following Costa e Silva et al. 2013; see also: Piles et al. 2017). That is, superior competitors will

169 breed earlier and cause their neighbors to breed later. Due to increased competition in years of high  
170 density, these indirect effects should be stronger in those years, both in the magnitude of the  
171 indirect effects but also in the strength of the covariance. This covariance is particularly important,  
172 since – as outlined above - it defines whether the IGEs are expected to increase or reduce the  
173 expected response to directional selection. Finally, we applied the equations of Bijma and Wade  
174 (2008) and Costa e Silva et al. (2013) to predict a response to selection in the presence of IGEs,  
175 which since IGEs are rarely quantified for wild animal populations, is also a first. This allowed us to  
176 assess how IGEs were likely to affect evolutionary responses to selection in this system.

177

## 178 Methods

179

### 180 Data collection

181 All data were collected as part of the Kluane Red Squirrel Project in the southwest Yukon, Canada.  
182 Since 1987 we have monitored two adjacent 40 ha. study areas (“Kloo” and “Sulphur”), bisected by  
183 the Alaska highway. Red squirrels of both sexes defend exclusive resource-based territories of  
184 around 0.3 ha (LaMontagne et al. 2013), centred around a midden, an aggregation of discarded  
185 white spruce cone scales underneath which red squirrels cache intact white spruce cones. Each  
186 study area is staked at 30m intervals in a grid system and we recorded the x- and y-coordinates of  
187 the center of each midden (to the nearest 3m). In the spring of each year we live trapped  
188 (Tomahawk Live Trap, Tomahawk, WI, USA) new individuals and gave them unique ear tags in each  
189 ear. We also located females (based on vocalizations at known and new territory locations),  
190 monitored them for signs of pregnancy and ear tagged their pups once they were born. Based on the  
191 previously identified stages of female pregnancy and the body mass of the pups once they were  
192 located, we then estimated the female’s parturition date. We also conducted censuses twice yearly  
193 (once in spring, once in autumn) using complete enumeration to ascertain the location of all  
194 individuals holding a territory, and so estimate population density. See McAdam *et al.* (2007) for  
195 further details on the study system.

196 Red squirrels collect food throughout the summer and autumn, cache it in their middens and  
197 rely on it to survive over winter (Fletcher et al. 2013a). The number of cached cones is positively  
198 associated with overwinter survival (juveniles: Larivée et al. 2010; juveniles and adults: LaMontagne  
199 et al. 2013). Squirrels primarily forage close to their midden, with occasional forays further afield,  
200 including small amounts of pilferage from other red squirrels’ hoards (Donald and Boutin 2011). We  
201 define the individuals a red squirrel potentially competes with as its  $n$  nearest neighbors ( $n$  was set  
202 at 6 for the majority of this analysis, but see below for explorations with different numbers of

203 neighbors). We defined neighborhoods and population densities based on our autumn census  
204 (August) rather than our spring census (May), because autumn is when squirrels are potentially  
205 competing for resources to hoard, and conception occurs well before May in most years. Gestation  
206 varies little around 35 days (Lair 1985), hence parturition dates cannot be influenced by conditions  
207 after conception. Squirrels occasionally defend a second adjacent midden, but we considered each  
208 squirrel's location to be based on the location of its primary midden. We then analysed each  
209 female's parturition date the following spring as influenced by her own genes (the DGE), and the  
210 identities and genotypes (the IGE) of those competing individuals as identified in the Autumn census.  
211 Some females gave birth in multiple years, in which case they were included each year they did so,  
212 with an updated set of nearest neighbors as necessary. Females may attempt multiple litters in years  
213 of high resources, or if their first litter fails (Boutin et al. 2006; McAdam et al. 2007; Williams et al.  
214 2014), but we limited our analyses to each female's first litter of each year (e.g. Dantzer et al. 2013).

215 We tagged pups while they were still on their mother's territory, so maternity is known for  
216 all non-immigrants. Male red squirrels provide no parental care. From 2003 onwards, paternities  
217 were therefore assigned by collecting tissues samples from the ears of adults and neonatal pups. We  
218 used these tissue samples to genotype all adults and pups since 2003 at 16 microsatellites (Gunn et  
219 al. 2005) analysed with 99% confidence using CERVUS 3.0 (Kalinowski *et al.* 2007; see Lane *et al.*  
220 2007, 2008 for further details). This method gives an estimated error rate of paternities, based on  
221 mismatches between known mother-offspring pairs, of around 2% (Lane et al. 2008), which we  
222 consider acceptable. Approximately 90% of yearly pups are assigned paternities with known males  
223 while the remaining 10% are analysed further in Colony 2.0 (Jones and Wang 2010) to determine  
224 whether they might still be full or half siblings from unknown sires using 95% confidence in  
225 maximum likelihoods.

226

## 227 Data analysis

228 Data on the locations of squirrel territories were available from the autumns in 1991-2015, and so  
229 we looked at parturition dates in the following springs (i.e. 1992-2016). All squirrels identified as  
230 holding a territory in an autumn census were included in this analysis, including females that did not  
231 attempt a litter in the following spring, and males. These individuals had missing values entered for  
232 their parturition dates. Their inclusion was nonetheless necessary as they acted as potential  
233 competitors during the autumn for those squirrels that did have a litter.

234 We used a stepwise forward model building approach as we were not confident in our  
235 ability to simultaneously estimate all variance and covariance parameters in the most complex  
236 model, which would limit our ability to evaluate individual parameters accurately. We initially fitted

237 a mixed-effects linear model, with the fixed effects of study area (a two-level factor), year (as a  
238 continuous linear covariate), whether or not the spruce trees “masted” (produced a super-  
239 abundance of cones; Silvertown 1980; Kelly 1994) in the year of the autumn census (a two-level  
240 factor), age and age<sup>2</sup> of the squirrel, and the random effects of year and squirrel identity, to account  
241 for repeated measures on squirrels across years. If the age of the squirrel was not known, the mean  
242 age of all other squirrels in that breeding season was entered. Estimating the squirrel identity  
243 random effect allowed the calculation of the (conditional) repeatability of individual squirrel  
244 parturition dates (Nakagawa and Schielzeth 2010). We divided raw parturition dates by the standard  
245 deviation of all observations, giving a sample with a variance of 1, making the variance components  
246 easier to interpret (Schielzeth 2010). We retained the same fixed effect structure for all subsequent  
247 models, instead building up the random effects structure. We first added the identities of the six  
248 nearest squirrels as 6 random effects (see below for our explorations of other possible neighborhood  
249 sizes), assuming that all random competitor effects came from the same distribution, with a mean of  
250 zero and a single variance to be estimated. This allows us to estimate an indirect phenotypic effect,  
251 and the covariance between this term and the direct effect of squirrel identity. We based “nearest”  
252 on location of the primary midden during the autumn census. Here the design matrix for the indirect  
253 effects either contained a “1” if the individual in that column was a competitor for the individual in  
254 the current row, or a “0” otherwise, indicating that its indirect effects either did or did not influence  
255 the current individual respectively (Muir 2005). This used the following model, with a population  
256 mean accounting for the fixed effects for  $i$  ( $\mu_{Fi}$ ), a direct phenotypic effect ( $P_{Di}$ ) and a total indirect  
257 influence arising from the sum of competitor specific indirect effects ( $P_{Sj}$ ) for the 6 nearest  
258 neighbors. Additionally, there are multiple measures per squirrel across years, hence we include the  
259 random effect for the year  $t$  ( $K_t$ ). Our model predicts a parturition date for the  $i$ th individual in a  
260 given year ( $y_{it}$ ) and so the residual term is specific to an individual in a year ( $e_{it}$ ). Note that no  
261 intensity of association factors were included in this model.

262

$$y_{it} = \mu_{Fi} + P_{Di} + \sum_{i \neq j}^n (P_{Sj}) + K_t + e_{it} \quad 1$$

264

265 This model estimated the variance among squirrels in their parturition dates, the variance in  
266 parturition dates caused by repeatable effects of neighbor identities, and the within-individual  
267 covariance between direct and indirect phenotypic effects (i.e.  $Cov(P_{Di}, P_{Si})$ ). Next we split these  
268 phenotypic effects into additive genetic and permanent environment effects by the incorporation of  
269 a pedigree (Kruuk 2004; Wilson et al. 2010). We estimated the DGEs and IGEs on parturition dates,



270 their covariance, and the equivalent terms for the permanent environmental effects. This was our  
271 base IGE model:

272

$$273 \quad y_{it} = \mu_{Fi} + A_{Di} + PE_{Di} + \sum_{i \neq j}^n (A_{Sj} + E_{Sj}) + K_t + e_{it} \quad 2$$

274

275 Where individual  $i$ 's parturition date in year  $t$ , is comprised of the fixed effect mean, a direct additive  
276 genetic effect ( $A_{Di}$ ), a direct permanent environmental effect ( $PE_{Di}$ ), both the additive genetic ( $A_{Sj}$ )  
277 and non-additive genetic ( $E_{Sj}$ ) indirect effects of all the  $n$  neighbors ( $j$ ) that  $i$  interacts with, a year  
278 term ( $K_t$ ), and an individual by year specific residual term ( $e_{it}$ ).

279 We next associated neighbors ( $j$ ) of each focal individual ( $i$ ) with variable intensity of  
280 association factors ( $f_{ij}$ ). This allowed the indirect effect of each neighbor  $j$  actually experienced by  $i$   
281 to be mediated by their spatial proximity, with  $f_{ij} = 1 / (1 + \text{distance})$ , where distance was the  
282 Euclidean distance between the center of individuals' territories, measured in units of 30m. This  
283 value is bounded between 0 and 1, with low values representing individuals that were far apart and  
284 high values representing individual that were close. We used the inverse of distance here, but any  
285 biologically relevant measure representing intensity of social interaction could be used (Fisher and  
286 McAdam 2017). To weight the strength of the indirect effects, we replaced all 1s in the indirect  
287 effect design matrix (as used in Models 1 and 2 above) with these terms (Muir 2005; Cappa and  
288 Cantet 2008). All individuals farther than the 6 nearest neighbors were not modelled as having an  
289 indirect effect (but see below). Our model structure was as follows:

290

$$291 \quad y_{it} = \mu_{Fi} + A_{Di} + PE_{Di} + \sum_{i \neq j}^n f_{ij} (A_{Sj} + E_{Sj}) + K_t + e_{it} \quad 3$$

292

293 This model has not been applied to wild animals before, and we fully acknowledge that our  
294 choice to consider only the 6 nearest neighbors here is somewhat arbitrary, as indeed is the scaling  
295 of  $f_{ij}$ . Therefore, we also explored different numbers of neighbors, and different methods for  
296 defining our  $f_{ij}$  terms. We then monitored how this influenced the estimates of the variance  
297 parameters, to determine whether the model was particularly sensitive to altering these factors (see  
298 also: Costa e Silva *et al.* 2017). We present results using  $f_{ij} = 1 / (1 + \text{distance}^2)$ , as well as where we  
299 defined the competitors as all those within 60, 130 or 200 metres, without weighting by distance, up  
300 to 24 competitors, and investigations with varying numbers of neighbors (1-5, 9, 12, 15, 18 & 24), in  
301 the supplementary materials (Table S1). Neither changing the number of neighbors nor rescaling  
302 intensity of association terms changed the number of model parameters estimated. Therefore,  
303 information criteria-based approaches for comparing model fits were not appropriate. Instead we

304 simply assessed the change in variance components, noting the size of the parameter estimates and  
305 size of the standard errors. We focus on the results with the 6 closest neighbors, as this seemed the  
306 median result among the variations we tried, and so the most appropriate model for our system.  
307 Using the inverse of distance<sup>2</sup> squared led to a large increase in the standard errors of the DGE  
308 estimate, which only occurred in this model, hence we considered simply the inverse of distance as  
309 more appropriate.

310         Having decided on our scaling of  $f_{ij}$  and to focus on 6 neighbors, a final step was to add a  
311 control for (non-socially determined) environmental heterogeneity in resource abundance. We  
312 predicted a negative covariance between neighbors due to competition for resources (especially  
313 during high-density conditions), however, this could be masked by (positive) spatial autocorrelation  
314 in resource availability within a study-area arising from non-social factors. This in turn could  
315 generate a net signal of positive phenotypic covariance among-neighbors (Stopher et al. 2012; Regan  
316 et al. 2016). Accounting for any such effect with a spatial autocorrelation term should limit the  
317 potential for non-social effects to bias our estimates of the influence individuals have on each other  
318 through competition (Costa e Silva and Kerr 2013; Costa e Silva et al. 2013). However, the multiyear  
319 data set adds considerable complexity (since the spatial distribution of territory quality is not  
320 consistent year-to-year; LaMontagne et al. 2013) and we were unable to obtain convergence from  
321 our data with a model in which a separate spatial autocorrelation term for each year. As a simpler  
322 alternative, we assigned each red squirrel within each year to one 150 m x 150 m square within a  
323 grid of non-overlapping squares that encompassed the study area (hereafter referred to as  
324 “squares”). Each square was given a unique label comprising its location and the year, and so by  
325 fitting this as a random effect we could account for any similarity among red squirrels within each  
326 150 m x 150 m area in each year. We repeated this analysis with squares of 75 m x 75 m or 300m x  
327 300 m. These results were qualitatively similar to the analysis with the intermediate size squares,  
328 and so are presented in the supplementary materials (Table S1).

329         We tested the significance of the DGE-IGE covariance using a likelihood ratio-test (LRT)  
330 between a model with the covariance freely estimated and one with it fixed to zero, and tested the  
331 significance of the IGEs using a LRT between the model with the IGEs (and a zero covariance) and a  
332 model without IGEs. We then tested the significance of the direct-indirect phenotypic covariance,  
333 and the indirect phenotypic variance, in the same way, in models without IGEs. We assumed the LRT  
334 statistic was distributed as a 50:50 mixture of  $\chi^2_1$  and  $\chi^2_0$  when testing single variance components  
335 (following Self and Liang 1987) but as  $\chi^2_1$  when testing covariances. Note that, even where terms  
336 were non-significant, they were retained as our best estimate of the corresponding parameter for  
337 our estimates of predicted responses to selection (as described below). We report DGE-IGE

338 correlations, although if the variance of either the DGEs or the IGEs was very small ( $<0.0001$ ), then  
339 we assumed it was essentially zero, and so then we report the correlation as “undefined”. Although  
340 they were not directly relevant to the biological hypotheses being tested, the statistical significance  
341 of the fixed effects was tested using conditional Wald tests (see: Gilmour et al. 2015). This approach  
342 to testing the significance of fixed effects in mixed linear models performs well in situations with  
343 limited sample sizes (Kenward and Roger 1997).

344

#### 345 Influence of population density on indirect effects

346 We consider population density during the resource caching period to be key to resource  
347 acquisition. Consequently, for any given year of parturition the relevant measure of density was  
348 obtained from the census in the autumn of the year *prior* to parturition. As the study area has grown  
349 marginally since the start of the project, we restricted counts to individuals holding a territory within  
350 a defined area 38ha that has been constant throughout the entire study period. Across both study  
351 areas in all years the median population density in the autumn was 1.69 squirrels ha<sup>-1</sup> (Fig. 1). We,  
352 therefore, labelled each study area within each year with a density higher than this as “high density”  
353 (1994, 1998-2000, 2006 and 2015 for both study areas, 1991-1993, 1995-1997, 2001 and 2002 for  
354 Sulphur only and 2011-2014 for Kloo only), and so the remainder as “low density” There were,  
355 therefore, 24 instances of high density conditions, and 26 instances of low density conditions. There  
356 are several instances of study areas having exactly the median density, hence why there are more  
357 low- than high-density conditions.

358 Building on the model with the 150 m x 150 m squares, we fitted an interaction between  
359 population density (high or low) and each random effect. This gave us separate density-specific  
360 estimates of each of the variances (DGEs, IGEs, and non-genetic versions) and covariances, the  
361 among-year variances and the among-square variances for low- and high-density study areas. To  
362 obtain stable model convergence, we were required to fix the direct permanent environment effect  
363 in low-density years to  $0.1 \times 10^{-4}$ , but since this term was estimated to be very small in all other  
364 models, this is likely not problematic. We also refitted a simpler formulation of the model in which  
365 indirect effects were not partitioned into genetic and non-genetic terms, to estimate and compare  
366 the magnitude of phenotypic indirect effects between low- and high-density conditions. There was a  
367 single residual variance in each model. We also included density as two-level factor in the fixed  
368 effects, and an interaction between this term and each of the other fixed effects, to allow them to  
369 vary between low- high-density conditions. We tested for significance of indirect effects in both high  
370 and low-density conditions in the same way as for the full model. When testing the significance of

371 terms for low-density, we maintained the full structure (i.e. IGEs and their covariance with DGEs) for  
 372 high-density conditions, and vice versa.  
 373  
 374

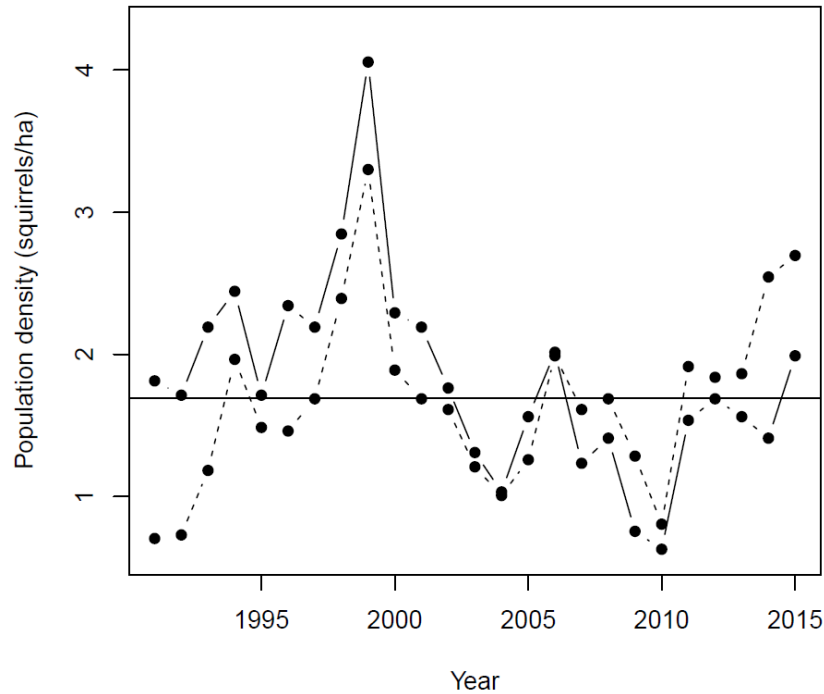

375  
 376  
 377 Figure 1. Estimated population densities across both study areas in our study (“Kloo” is solid  
 378 line, “Sulphur” is dashed line). Points above the line (the median density: 1.69 squirrels ha.<sup>-1</sup>)  
 379 were counted as “high density”, points below the line as “low density”.

380

381 Calculating variance parameters and the predicted response to selection

382 To assess the contribution of indirect effects to phenotypic and genetic variances, we estimated the  
 383 variance in individuals’ phenotypic effects on the population mean parturition date ( $\hat{\sigma}_{PE}^2$ ,  
 384 incorporating both consistent direct and indirect phenotypic effects; for models without genetic  
 385 terms), and variance in individuals’ heritable influence on the population mean parturition date ( $\hat{\sigma}_H^2$ ;  
 386 for models with genetic terms, commonly referred to as the “total heritable variance”). Following  
 387 Bijma (2011) and Costa e Silva *et al.* (2013) these are:

388

$$389 \quad \hat{\sigma}_{PE}^2 = V_{PD} + 2n\bar{f}_{ij}Cov(P_D, P_I) + (n\bar{f}_{ij})^2V_{PI} \quad 4$$

390

391 
$$\hat{\sigma}_H^2 = V_{AD} + 2n\bar{f}_{IJ} Cov(A_D, A_I) + (n\bar{f}_{IJ})^2 V_{AI}$$
 5

392

393 Where  $n$  is the number of neighbors (excluding the focal individual, so 6),  $\bar{f}_{IJ}$  is the mean intensity of  
394 association factor,  $V_{PD}$  and  $V_{AD}$  are the direct phenotypic and additive genetic variances  
395 respectively,  $Cov(P_D, P_I)$  and  $Cov(A_D, A_I)$  are the phenotypic and genetic direct-indirect  
396 covariances respectively, and  $V_{PI}$  and  $V_{AI}$  are the indirect phenotypic and additive genetic variances  
397 respectively. The  $\bar{f}_{IJ}$  was calculated as 0.330 across the entire data set, 0.298 at low densities and  
398 0.352 at high densities, which means a squirrel's 6 nearest neighbors were on average 60.9m, 70.7m  
399 and 55.2m from it across the whole dataset, at low densities, or at high densities respectively. Note  
400 that  $\hat{\sigma}_H^2$ , unlike traditional heritability, can exceed 1; see Bijma (2011) for the mathematical  
401 demonstration of this, and Ellen *et al.* (2014) for empirical examples in livestock.

402 In order to calculate the predicted response to selection in the presence of IGEs among  
403 related individuals, we combined equation 15 of Bijma and Wade (2008), with the relative strength  
404 of multilevel selection ( $g$ ) set to zero, and equation S5\_2 of Costa e Silva *et al.* (2013), setting total  
405 phenotypic variance as 1:

406 
$$\Delta\bar{P} = \beta_{W_{DP}} \{r\hat{\sigma}_H^2 + (1-r)[V_{AD} + n\bar{f}_{IJ} Cov(A_D, A_I)]\}$$
 6

408

409 Where the change in the mean phenotype ( $\Delta\bar{P}$ ) is predicted by the selection gradient of the  
410 phenotype on relative direct fitness ( $\beta_{W_{DP}}$ ), multiplied by a term encompassing the genetic variance  
411 parameters. We estimated  $\beta_{W_{DP}}$  across all females in the whole dataset by regressing relative  
412 fitness (number of pups born to each individual in a given year that recruited to the population as  
413 adults, divided by the population average for that year) on standardised parturition dates (mean  
414 centred and divided by the standard deviation across the whole dataset). We then repeated this  
415 with an interaction with high/low density, to give different estimates for  $\beta_{W_{DP}}$  in each condition.  
416 Densities (and competitive neighborhoods) in the autumn of a given year were associated with  
417 parturition dates and fitness in the following spring (year +1). We then multiplied the predicted  
418 change by the standard deviation of parturition date, to give the result as "days per generation".  
419 Relatedness ( $r$ ) is the mean coefficient of relatedness among the 7 squirrels in each neighborhood  
420 (the focal squirrel and its 6 nearest neighbors, note as  $n$  was already defined as the number of  
421 neighbors excluding the focal individual,  $n-1$  in eq. 15 of Bijma and Wade (2008) is altered to  $n$ ). We  
422 used the pedigree to calculate  $r$  as 0.094 across the entire data set, 0.087 at low densities and 0.098  
423 at high densities. We compare this to a case where IGEs were equal to zero, and so the response to  
424 selection was equal to  $\beta_{W_{DP}} V_{AD}$ .

425

## 426 Results

427

428 In total, 1862 unique red squirrels were recorded a total of 4362 times in autumn censuses as  
429 holding territories, and so were included in the analysis. There were 555 unique females that had at  
430 least one litter, with a mean of 2.1 (range = 1-8, standard deviation = 1.3) recorded parturition dates  
431 each. There were 364 females that had no recorded parturition dates, and 943 males. Variance  
432 components from the stepwise-forwards model building process are presented in Table 1.

433 Individuals showed a limited degree of consistency in their parturition dates, with the direct  
434 variance among-individuals in parturition date in model 1 of Table 1 accounting for 5.2% of the  
435 observed phenotypic variance. We then added indirect phenotypic effects of neighbors (model 2),  
436 which were significant (LRT,  $\chi^2_1 = 8.235$ ,  $p = 0.002$ ), but the covariance between the direct and  
437 indirect phenotypic effects was not ( $\text{cor} = -0.143$ , LRT,  $\chi^2_1 = 0.695$ ,  $p = 0.405$ ), indicating that  
438 individuals that give birth earlier do not influence their neighbors in any particular direction.  
439 Individuals' consistent differences in their own phenotypes and consistent effects on neighbors ( $\hat{\sigma}_{PE}^2$ )  
440 was calculated as 8.1% of the observed phenotypic variation in model 2.

441 Parturition date showed direct heritability, with  $V_{AD}$  in model 5 accounting for 4.8% of the  
442 observed phenotypic variance (note this differs from previous estimates of  $h^2$  for this trait in this  
443 system, but see Wilson 2008 for how  $h^2$  and  $V_A / V_P$  can differ). The estimate for the IGEs was not  
444 different from zero (LRT,  $\chi^2_{0.5} = 0.003$ ,  $p = 0.480$ ), as was the DGE-IGE covariance ( $\text{cor} = \text{undefined}$ ,  
445 LRT,  $\chi^2_{0.5} = 0.119$ ,  $p = 0.729$ ). We calculated the total heritable variance of parturition date,  $\hat{\sigma}_H^2$ , as  
446 6.8%, a modest increase over  $V_{AD}$ . The very small DGE-IGE covariance indicates that genotypes for  
447 early parturition dates did not affect their neighbors in any consistent direction. Parturition dates  
448 differed among squares and greatly among years, with the square term accounting for 4.0% of the  
449 total variance, while variance among-years accounted for 32.0%.

450 Estimates of the fixed effects are presented in Table 2. In short, red squirrels on the  
451 "Sulphur" study area had marginally later parturition dates than those on "Kloo", but there was no  
452 linear temporal trend across years. Parturition dates were significantly earlier following mast years  
453 by approximately 40 days. Older squirrels had earlier parturition dates, although the positive  
454 quadratic effect indicates a nonlinear effect of age in which squirrels began to breed later at older  
455 ages.

456

457 High vs low density comparison

458 Results from models 6 and 7, where variance components were separately estimated in low- and  
459 high-density conditions are presented in Table 1 and summarised in Fig. 2. Testing for the presence  
460 of indirect phenotypic effects (model 6) indicated that in high density conditions, there were  
461 significant phenotypic indirect effects (LRT,  $\chi^2_{0.5} = 7.005$ ,  $p = 0.004$ ), although the negative covariance  
462 was not different from zero ( $\text{cor} = \text{undefined}$ , LRT,  $\chi^2_{0.5} = 0.305$ ,  $p = 0.581$ ). In low density conditions  
463 however, both the variance in indirect phenotypic effects (LRT,  $\chi^2_{0.5} = 0.049$ ,  $p = 0.412$ ) and the  
464 direct-indirect phenotypic covariance ( $\text{cor} = \text{undefined}$ , LRT,  $\chi^2_{0.5} = 0.839$ ,  $p = 0.360$ ) were not  
465 different from zero. From model 6,  $\hat{\sigma}_{PE}^2$  was calculated to be 18.4% in low-density years, and 17.5%  
466 in high-density years.

467 These indirect effects were split into genetic and non-genetic components for model 7. In  
468 high density conditions, the IGEs were considerably stronger than across the whole dataset, and  
469 more than one standard error from zero, although still not significantly different from zero (LRT,  $\chi^2_{0.5}$   
470  $= 0.607$ ,  $p = 0.218$ ). The covariance between DGEs and IGEs was negative but not different from zero  
471 ( $\text{cor} = -0.401$ , LRT,  $\chi^2_{0.5} = 0.688$ ,  $p = 0.407$ ). Unsurprisingly, given that we detected no phenotypic  
472 indirect effects in low-density conditions, the IGEs (LRT,  $\chi^2_{0.5} = 0.000$ ,  $p = 0.500$ ) and the DGE-IGE  
473 covariance in these conditions were also not different from zero ( $\text{cor} = \text{undefined}$ , LRT,  $\chi^2_1 = 0.566$ ,  $p$   
474  $= 0.452$ ). Although we reiterate that neither covariance was statistically significant, based on our  
475 parameter estimates in low-density conditions  $\hat{\sigma}_H^2$  was 14.3%, which was higher than  $V_{AD}$ , as this  
476 calculation includes the positive DGE-IGE covariance estimate (despite the lack of variance in IGEs  
477 rendering the correlation undefined). In high-density conditions  $\hat{\sigma}_H^2$  was 14.2%, which is similar to  
478 the estimate at low densities, as the additional genetic variance from IGEs is counteracted by the  
479 negative DGE-IGE covariance (see eq. 5). We stress that, as the estimates for the IGEs and their  
480 covariances with the DGEs were not significantly different from zero, the estimates of  $\hat{\sigma}_H^2$  should be  
481 interpreted with caution.

482 The square term revealed that there was some variation attributable to spatial location in  
483 both conditions, accounting for 4.2% in low-density, and 3.1% in high-density conditions, of the  
484 variance in model 7. Finally, there was also substantial among-year variance in both conditions,  
485 accounting for 32.2% and 38.4% for the observed variance in low and high-density conditions  
486 respectively. Estimates for fixed effects from model 7 are presented in the supplemental materials  
487 (Table S2).

488 **Table 1.** Variance component estimates (with their approximate standard errors in brackets) for each element of the variance-covariance structure from  
 489 our models. Terms that were bound to values very close to zero will not have a standard error estimated, and so have “-” instead. Models without a given  
 490 term have “NA” entered in that cell. Terms highlighted in bold were >2 times greater than their standard errors, while terms underlined were between 1  
 491 and 2 times greater than their standard errors. Variance in direct genetic effects are indicated by  $V_{AD}$ , in indirect genetic effects by  $V_{AI}$ , and their covariance  
 492 by  $Cov(A_D, A_I)$ . Equivalent notation with “P” instead of “A” refers to variance in purely phenotypic effects, or if the model includes genetic effects,  
 493 permanent environment effects.  $V_S$  is the among-square variance (with squares of size 150mx150m),  $V_Y$  is the among-year variance, and  $V_R$  is the residual  
 494 variance.

| Model                                                   |              | $V_{AD}$                | $V_{AI}$                | $Cov(A_D, A_I)$     | $V_{PD}$                | $V_{PI}$                | $Cov(P_D, P_I)$   | $V_Y$                   | $V_S$                   | $V_R$            |
|---------------------------------------------------------|--------------|-------------------------|-------------------------|---------------------|-------------------------|-------------------------|-------------------|-------------------------|-------------------------|------------------|
| <b>Stepwise model building process</b>                  |              |                         |                         |                     |                         |                         |                   |                         |                         |                  |
| 1. Direct phenotype only                                |              | NA                      | NA                      | NA                  | <b>0.052</b><br>(0.012) | NA                      | NA                | <b>0.320</b><br>(0.099) | NA                      | 0.273<br>(0.015) |
| 2. Direct and indirect phenotypes                       |              | NA                      | NA                      | NA                  | <b>0.026</b><br>(0.012) | <b>0.017</b><br>(0.003) | -0.003<br>(0.005) | <b>0.315</b><br>(0.098) | NA                      | 0.205<br>(0.015) |
| 3. Direct and indirect, genetic and non-genetic effects |              | <b>0.039</b><br>(0.012) | < 0.001<br>(0.002)      | > -0.001<br>(0.006) | < 0.001<br>(-)          | <b>0.015</b><br>(0.005) | 0.002<br>(0.020)  | <b>0.317</b><br>(0.099) | NA                      | 0.201<br>(0.015) |
| 4. As above, with inverse distance weighting            |              | <b>0.047</b><br>(0.012) | 0.005<br>(0.026)        | -0.003<br>(0.016)   | < 0.001<br>(-)          | <b>0.089</b><br>(0.037) | 0.006<br>(0.021)  | <b>0.318</b><br>(0.099) | NA                      | 0.217<br>(0.015) |
| 5. As above, with square term                           |              | <b>0.048</b><br>(0.012) | < 0.001<br>(-)          | 0.005<br>(0.015)    | < 0.001<br>(-)          | <b>0.063</b><br>(0.023) | -0.018<br>(0.020) | <b>0.320</b><br>(0.099) | <b>0.040</b><br>(0.014) | 0.192<br>(0.016) |
| <b>High vs. low density comparison</b>                  |              |                         |                         |                     |                         |                         |                   |                         |                         |                  |
| 6. Phenotypic indirect effects split by density         | Low density  | <b>0.050</b><br>(0.020) | NA                      | NA                  | < 0.001<br>(-)          | 0.034<br>(0.044)        | 0.021<br>(0.022)  | <b>0.322</b><br>(0.126) | <u>0.038</u><br>(0.024) | 0.198<br>(0.018) |
|                                                         | High density | <b>0.053</b><br>(0.018) | NA                      | NA                  | < 0.001<br>(-)          | <b>0.067</b><br>(0.029) | -0.011<br>(0.019) | <b>0.379</b><br>(0.150) | <u>0.032</u><br>(0.018) |                  |
| 7. IGE model split by density                           | Low density  | <b>0.047</b><br>(0.020) | < 0.001<br>(-)          | 0.027<br>(0.030)    | < 0.001<br>(-)          | 0.021<br>(0.045)        | -0.003<br>(0.036) | <b>0.322</b><br>(0.126) | <u>0.042</u><br>(0.024) | 0.189<br>(0.017) |
|                                                         | High density | <b>0.053</b><br>(0.018) | <u>0.038</u><br>(0.037) | -0.018<br>(0.023)   | < 0.001<br>(-)          | 0.033<br>(0.046)        | -0.001<br>(0.026) | <b>0.384</b><br>(0.151) | <u>0.031</u><br>(0.018) |                  |



## Predicted response to selection

Across all years, selection favoured squirrels with earlier part dates (linear selection gradient  $\beta = -0.249$ ), and while selection varied breeding earlier was favoured whether squirrels were breeding under high ( $\beta = -0.286$ ) or low ( $\beta = -0.239$ ) densities. The standard deviation of parturition date was 23.32. From eq. 6, this gives a predicted response when accounting for IGEs across the entire data set of  $-0.342$  days generation<sup>-1</sup>. Despite stronger selection at high densities, we calculated a slower predicted evolutionary response, due to the negative DGE-IGE covariance. At low densities, updating all parameters except  $n$ , the predicted response was  $-0.553$  days generation<sup>-1</sup>, while at high densities it was  $-0.183$  days generation<sup>-1</sup>. Predictions solely based on additive genetic variance multiplied by the selection gradient would have been  $-0.279$ ,  $-0.262$ , and  $-0.353$  days generation<sup>-1</sup>, for the whole data set, low densities and high densities respectively, therefore matching selection strengths.

**Table 2.** Estimates and relevant statistics for fixed effects from final model with all years. Study area was a two-level factor, with Kloo as the reference level, hence the shown estimate is for the deviation of the “Sulphur” study area. Following a mast was a two-level factor, with not following a mast as the default, hence the estimate is for the deviation in parturition dates following a mast year. The denominator degrees of freedom are indicated by df\_d, while the numerator degrees of freedom were 1 in all cases.

| Term                   | Estimate | Standard error | df_d   | F-statistic | P-value |
|------------------------|----------|----------------|--------|-------------|---------|
| Intercept              | -6.684   | 32.355         | 23.3   | 0.06        | 0.810   |
| Study area (SU)        | 0.176    | 0.054          | 5.72   | 10.68       | 0.002   |
| Year                   | 0.006    | 0.016          | 23.1   | 0.16        | 0.693   |
| Following a mast (yes) | -1.71    | 0.288          | 22     | 35.57       | < 0.001 |
| Age                    | -0.002   | < 0.001        | 1091.5 | 145.85      | < 0.001 |
| Age <sup>2</sup>       | < 0.001  | < 0.001        | 1164.0 | 95.59       | < 0.001 |

## Discussion

Indirect effects are present and change with population density

Red squirrels live in territories surrounded by conspecifics, with whom they engage in social interactions through vocalizations, competition for resources, and mating interactions. Our analyses show that these interactions can lead to indirect effects on female squirrel reproductive traits. These are detected here as a repeatable influence of competitor identity on the parturition date of focal individuals. Our results also suggest that these indirect effects are more important determinants of focal phenotypes when density is high. Specifically, at high densities, there is significant variation in

the extent to which squirrels influence each other's parturition dates, but this is not the case at low densities.

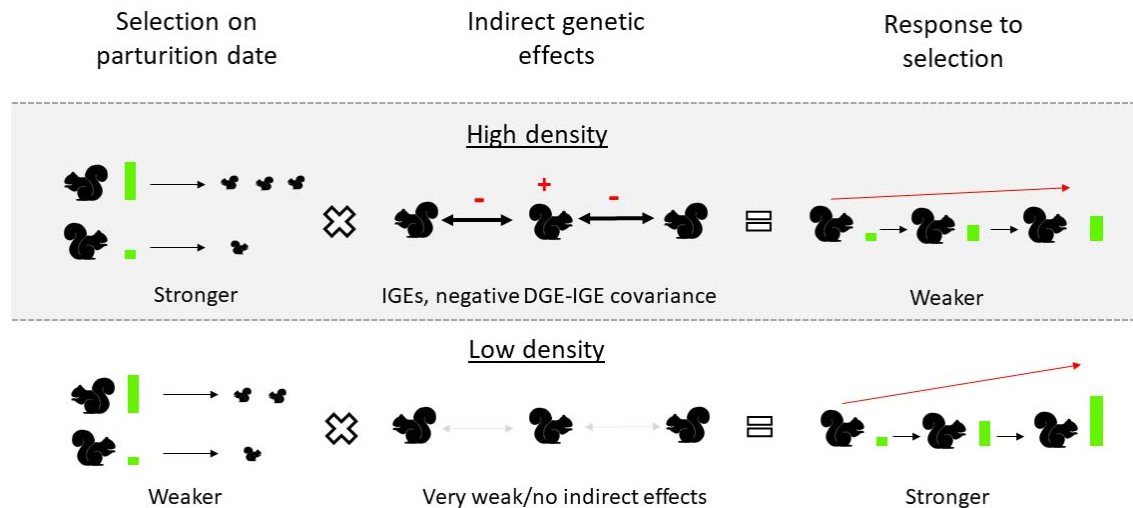

Figure 2. A summary of our results for the analysis of indirect genetic effects at high and low densities. At high density selection was stronger ( $\beta = -0.286$ ), and there were direct genetic effects (variance = 0.053). There were significant phenotypic indirect effects, and non-zero but statistically non-significant indirect genetic effects (variance = 0.038). The DGE-IGE covariance was estimated to be negative (estimate = -0.018). These parameters gave a slow response to selection (response =  $-0.183 \text{ days.generation}^{-1}$ ). At low density selection was weaker ( $\beta = -0.239$ ), while there were direct genetic effects of a similar magnitude to at high densities (variance = 0.047), but indirect phenotypic and genetic effects were absent (variance =  $< 0.0001$ ). The DGE-IGE covariance was estimated still (estimate = 0.027). These parameters gave a moderate response to selection (response =  $-0.553 \text{ days.generation}^{-1}$ , giving earlier parturition dates). Larger green bars represent earlier parturition dates. Red symbols represent the DGE-IGE covariance, showing that individuals with genes to be early (red plus) cause their neighbors to give birth later (red minus).

The social effects on parturition date we documented indicate that in some contexts an individual's phenotype is partly under the control of those it socially interacts with, even in a solitary and territorial species. Work on Eucalyptus trees (Costa e Silva et al. 2013) implicated competition for limited resources as the source of indirect effects, and our results are consistent with this idea. Earlier studies have shown that red squirrel females may be food limited to some degree, aside from

in years following a mast event. For example, earlier parturition dates and lower levels of oxidative stress were found when food was supplemented (Kerr et al. 2007; Fletcher et al. 2013b; Williams et al. 2014), and individuals are more likely to survive over winter with a larger food cache (Larivée et al. 2010; LaMontagne et al. 2013), suggesting that not all individuals have enough stored food. However, female squirrels appear to reproduce below capacity in non-mast years, and upregulate their reproduction *before* pulsed resources are available (Boutin et al. 2006, 2013), and so they are likely not completely food-limited. The additional insight from the current study is that, for focal individuals, competitive effects on phenotype depend not simply on high density, but also on the identities – and so phenotypes - of their nearest neighbors.

Our analysis did not explore the specific mechanism (or trait(s)) that mediate indirect phenotypic effects from competition. However, based on prior knowledge of the system we speculate that red squirrels might influence each other's parturition dates through vocal cues rather than, for instance, physical interactions. Red squirrels give territorial calls ("rattles"), to which neighbors behaviorally respond to (Shonfield 2010) and which function to maintain their territory from conspecifics (Smith 1978; Lair 1990; Siracusa et al. 2017). Additionally, red squirrels rattle more when they have a higher local population density (Dantzer et al., 2012; Shonfield et al. 2012), while red squirrel mothers increase the growth rate of their pups when playback of territorial vocalizations leads to the perception of higher local population density (Dantzer et al. 2013). This is through upregulation of maternal glucocorticoids, part of the stress axis (Dantzer et al. 2013). Other life history traits, such as parturition date, may be influenced by rattles at high densities, allowing individuals to influence each other's parturition dates. Therefore, acoustic interactions among-neighbors, which enable neighbors to influence each other's reproduction, may be a source of indirect effects, particularly in high-density conditions.

#### Indirect effects with a limited heritable basis

While our analyses provide statistical support for indirect effects of competitors on a focal individual's parturition date, we were unable to conclusively demonstrate that these indirect effects were underpinned by genetic variation. Estimated effect sizes were larger at high densities, in line with our predictions and the phenotypic effects. If we incorporated the estimates of variance attributable to IGEs, and the DGE-IGE covariances, into our predicted response to selection, we expected a faster response to selection in low-density conditions ( $-0.553$  days generation<sup>-1</sup>) when selection was weakest, while a slower response to selection in high-density conditions ( $-0.183$  days generation<sup>-1</sup>) when selection was strongest, compared to across the whole data set ( $-0.342$  days generation<sup>-1</sup>). Therefore, a negative DGE-IGE covariance counteracted stronger selection at high

densities to give a slower evolutionary response. However, while the point estimates of predicted change indicate IGEs are potentially strong enough to make a meaningful difference to evolutionary dynamics, we acknowledge they are estimated with high uncertainty.

Previous work on livestock has shown that IGEs negatively correlated with DGEs can reduce or even reverse the expected response to selection (Costa e Silva et al. 2013; Muir et al. 2013; Ellen et al. 2014), as we have found. The evolutionary stasis of heritable traits under directional selection is a well-known observation in need of an explanation in the study of trait evolution in wild populations (Merilä et al. 2001; Kokko et al. 2017). IGEs that consistently counteract selection responses (compared to a DGE-only scenario) would reduce evolutionary change, as we have shown under high-densities, and so could contribute to a lack of evolutionary change. Whether this is a general explanation for evolutionary stasis remains to be explored (Wilson 2014).

The contribution of the variance of the IGEs, and the DGE-IGE covariance to the expected response to selection is not certain, as these estimates were not statistically significant. If IGEs are not different from zero, then the expected response to selection may not differ from that predicted by the breeder's equation (Bijma and Wade 2008). We note that the non-significance of our IGE variance estimates may have been driven by a high degree of uncertainty (large standard errors), rather than the magnitude of the effect, as in high density years the  $V_{AI}$  was quite close in absolute size to  $V_{AD}$ , and their contribution to total heritable variance and the predicted response to selection was large enough to change the expected response in different conditions. As such, the value of incorporating these estimates into predictive models is possibly large, but uncertain.

Predictions about the speed of evolution based on  $V_{AD}$  or  $\sigma_H^2$  can be misleading, because, as we have demonstrated, a negative DGE-IGE covariance detracts from the response to selection (see eq. 6), even if a large variance in IGEs gives a larger  $\sigma_H^2$  (eq. 5). This is similar to how negative genetic correlations between traits under equivalent selection can limit their evolution (Lande 1979; Kirkpatrick and Lande 1989). Additionally, there are several reasons why not all of  $\sigma_H^2$  may be utilized in the response to selection. As can be seen from eq. 6, the response to selection in the presence of IGEs is not simply  $\sigma_H^2$  multiplied by selection. Neighborhoods or groups made up of unrelated individuals, small group sizes, and a near-zero or negative covariance between DGEs and IGEs will also cause the  $\sigma_H^2$  to be somewhat discounted when calculating the response. However, given their prevalence among livestock (Ellen et al. 2014), IGEs may well influence the response to selection more broadly, hence they need to be considered more often when attempting to predict the microevolution of populations, and to explain phenomena such as evolutionary stasis (Merilä et al. 2001; Ellen et al. 2014; McAdam et al. 2014). This is true even in populations of wild animals that do

not live in clearly defined groups, but in an irregular network of territories (see also Nunney (1985) for related work on the evolution of altruism in “continuous arrays” of animals).

#### Altering competition indices and neighborhood size

Varying the intensity of association factors (i.e. how strongly we weighted neighbors at different distances) and the size of the neighborhood did alter the balance between the estimated direct and indirect effects, as well as estimated relative contribution of genetic and environmental influences (see Table S1). Weighting the closest individuals more strongly, by only including the 1-3 nearest neighbors, or using the inverse of distance or distance<sup>2</sup>, or by only including individuals within 60 m, gave similar results. In all these variants the variance arising from DGEs increased marginally compared to the model where all neighbors were weighted equally. This effect was more pronounced when using the inverse of distance<sup>2</sup> to define the intensity of association factors. We note that the standard errors of estimates for direct additive genetic variance ( $V_{AD}$ ) in the model using the inverse of distance<sup>2</sup> were greatly increased, causing the estimate to be within two standard errors of zero (i.e. nominally non-significant). This was the only model explored where this occurred. Weighting further individuals as strongly as close individuals, either by not including any intensity of association factors for the 6 closest individuals, or by including all individuals within 200 m and weighting them equally, gave very low estimates for the IGEs. This could suggest that individuals at greater distances do not consistently influence their neighbors.

Increasing the number of neighbors considered in the analysis beyond six led to larger estimates for the variance arising from the non-genetic indirect effects ( $V_{PI}$ ). A larger estimate for the  $V_{PI}$  was also present in the model before the square term was added. This suggests the apparent non-genetic influence of neighbors at large spatial scales, as indicated by  $V_{PI}$ , may be driven by shared environmental factors at the larger scale causing sets of neighbors to be consistently different from other sets, rather than by social interactions of the focal individual causing their neighbors to be consistently different. Note also that increasing the number of interacting individuals is expected to increase the difficulty in estimating indirect effects (Muir 2005). Decreasing the number of neighbors tended to increase the variance attributed to the DGE, while IGEs showed a non-linear trend, peaking in magnitude with 4 neighbors and then falling back down towards zero. At these neighborhood sizes,  $V_{PI}$  was typically estimated near zero, but grew in size once 5 or more neighbors were considered. A neighborhood of size 6 was therefore the smallest neighborhood where any indirect effects were more than two standard errors from zero, although these were no evidence these had a genetic component, at least across the whole dataset. Overall,

these results do not indicate that inferences from our model with the six closest neighbors, weighted by the inverse of distance, are inappropriate for the system.

The approach we used, based on the work of Muir (2005) and Cappa and Cantet (2008) can be applied to organisms in a range of social structures. Due to the relatively recent increase in usage of techniques such as social network analysis (Krause et al. 2007, 2014; Croft et al. 2008), estimates of pairwise associations within populations of animals have been made in many systems. These values can be used as the intensity of association factors, as we used the inverse of distance, to scale indirect effects (Fisher and McAdam 2017). To estimate IGEs, this must be twinned with information on the phenotypes and relatedness of the individuals in the population. We had a large dataset with good information on phenotypes and relatedness of individuals, yet high uncertainty around moderately large estimates of IGEs did not distinguish them from zero. The requirement to phenotype, genotype and assess the social relationships of many individuals within a population may well limit the range of study systems this approach can be used in. However, with decreases in the cost of tracking technologies and in the cost of assessing the genetic relatedness of animals (Béréanos et al. 2014), more study systems will begin to be able to apply this and similar models.

## Conclusions

Previous to this study, IGEs had only ever been estimated for wild animals in the context of pairwise (dyadic) social interactions. We extended this to estimate IGEs on a life-history trait with links to fitness in a population of wild animals that do not interact in discretely defined groups. We also incorporated varying strengths of closeness of association between individuals to more accurately represent the heterogeneous and complex nature of social interactions in the natural world. We found that indirect effects were present, were stronger at high densities, and may (but equally may not) have a heritable component. Predicting selection responses from a model that incorporated IGEs indicates that they can both slow down (at high population density) and speed up (at low density) the expected response to selection for earlier parturition dates. This is despite selection actually being stronger at high densities. However, these patterns are based on point estimates for genetic parameters that are characterised by high uncertainty and, as noted, we cannot exclude the possibility that the indirect effects have a non-genetic basis. Nonetheless, significant indirect phenotypic effects were detected and appear to increase in importance at high density. This is consistent with competition for limited food resources being the source of neighbor influences on focal life-history traits. Exactly how this competition is mediated remains to be determined. The estimation of indirect effects, and IGEs specifically, should be extended to more systems where densities and resource availabilities vary (either naturally or artificially) to determine whether the

patterns we have observed are general. While we did not conclusively demonstrate IGEs are present, we think wider estimation of effect sizes is useful even if power is limiting to make strong inferences in any single case. The method we have used is flexible enough to be applied to alternative systems, hence we look forward to the accumulation of more estimates of IGEs in the wild to detect general patterns.

## Acknowledgements

We thank Agnes MacDonald for long-term access to her trapline, and to the Champagne and Aishihik First Nations for allowing us to conduct work on their land. We thank all the volunteers, field assistants and graduate students whose tireless work makes the KRSP possible. We thank Bill Szkotnicki and Piter Bijma and assistance with the analyses. We have no conflicts of interest. This is KRSP paper number XX.

## Author contributions

AGM, AJW, and DNF conceived of the research question. SB initiated the long-term study and all authors contributed to field logistics, data collection and the writing of the manuscript. DNF drafted the manuscript and conducted the data analysis, with guidance from AJW and AGM. All authors approved of the final manuscript for submission.

## Funding statement

Funding for this study was provided by the Natural Sciences and Engineering Research Council, the Northern Scientific Training Program, the National Science Foundation, and the Ontario Ministry of Research and Innovation

## References

- Alemu, S. W., P. Bijma, S. H. Møller, L. Janss, and P. Berg. 2014. Indirect genetic effects contribute substantially to heritable variation in aggression-related traits in group-housed mink (*Neovison vison*). *Genet. Sel. Evol.* 46:30. BioMed Central Ltd.
- Béréanos, C., P. A. Ellis, J. G. Pilkington, and J. M. Pemberton. 2014. Estimating quantitative genetic parameters in wild populations: a comparison of pedigree and genomic approaches. *Mol. Ecol.* 23:3434–51. Wiley-Blackwell.
- Bijma, P. 2011. A General Definition of the Heritable Variation That Determines the Potential of a Population to evolve. *Genetics* 189:1347–1359.
- Bijma, P. 2010a. Estimating indirect genetic effects: precision of estimates and optimum designs. *Genetics* 186:1013–28.
- Bijma, P. 2010b. Multilevel selection 4: Modeling the relationship of indirect genetic effects and group size. *Genetics* 186:1029–31. Genetics Society of America.

- Bijma, P., and M. J. Wade. 2008. The joint effects of kin, multilevel selection and indirect genetic effects on response to genetic selection. *J. Evol. Biol.* 21:1175–88.
- Boutin, S., A. McAdam, and M. Humphries. 2013. Anticipatory reproduction in squirrels can succeed in the absence of extra food. *New Zeal. J. Zool.* 40:337–339. Taylor & Francis.
- Boutin, S., L. A. Wauters, A. McAdam, M. Humphries, G. Tosi, and A. Dhondt. 2006. Anticipatory reproduction and population growth in seed predators. *Science (80-. )*. 314:1928–1930.
- Brichette, I., M. I. Reyer, and C. García. 2001. A genetic analysis of intraspecific competition for growth in mussel cultures. *Aquaculture* 192:155–169.
- Brinker, T., E. D. Ellen, R. F. Veerkamp, and P. Bijma. 2015. Predicting direct and indirect breeding values for survival time in laying hens using repeated measures. *Genet. Sel. Evol.* 47:75. BioMed Central.
- Brommer, J. E., and K. Rattiste. 2008. “Hidden” reproductive conflict between mates in a wild bird population. *Evolution* 62:2326–33.
- Cappa, E. P., and R. J. C. Cantet. 2008. Direct and competition additive effects in tree breeding: Bayesian estimation from an individual tree mixed model. *Silvae Genet.* 57:45–56.
- Costa e Silva, J., and R. J. Kerr. 2013. Accounting for competition in genetic analysis, with particular emphasis on forest genetic trials. *Tree Genet. Genomes* 9:1–17. Springer-Verlag.
- Costa e Silva, J., B. M. Potts, P. Bijma, R. J. Kerr, and D. J. Pilbeam. 2013. Genetic control of interactions among individuals: Contrasting outcomes of indirect genetic effects arising from neighbour disease infection and competition in a forest tree. *New Phytol.* 197:631–641.
- Costa e Silva, J., B. M. Potts, A. R. Gilmour, and R. J. Kerr. 2017. Genetic-based interactions among tree neighbors: identification of the most influential neighbors, and estimation of correlations among direct and indirect genetic effects for leaf disease and growth in *Eucalyptus globulus*. *Heredity (Edinb)*, doi: 10.1038/hdy.2017.25.
- Croft, D. P., R. James, and J. Krause. 2008. *Exploring Animal Social Networks*. Princeton University Press, Oxford.
- Croft, D. P., J. Krause, and R. James. 2004. Social networks in the guppy (*Poecilia reticulata*). *Proc. Biol. Sci.* 271 Suppl:S516-9.
- Dantzer, B., S. Boutin, M. M. Humphries, and A. G. McAdam. 2012. Behavioral responses of territorial red squirrels to natural and experimental variation in population density. *Behav. Ecol. Sociobiol.* 66:865–878.
- Dantzer, B., A. E. M. Newman, R. Boonstra, R. Palme, S. Boutin, M. M. Humphries, and A. G. McAdam. 2013. Density Triggers Maternal Hormones That Increase Adaptive Offspring Growth in a Wild Mammal. *Science (80-. )*. 340:1215–1217.
- Donald, J. L., and S. Boutin. 2011. Intraspecific cache pilferage by larder-hoarding red squirrels (*Tamiasciurus hudsonicus*). *J. Mammal.* 92:1013–1020.
- Ellen, E. D., K. Peeters, M. Verhoeven, R. Gols, J. A. Harvey, M. J. Wade, M. Dicke, and P. Bijma. 2016. Direct and indirect genetic effects in life-history traits of flour beetles (*Tribolium castaneum*). *Evolution* 70:207–17.
- Ellen, E. D., T. B. Rodenburg, G. A. A. Albers, J. E. Bolhuis, I. Camerlink, N. Duijvesteijn, E. F. Knol, W. M. Muir, K. Peeters, I. Reimert, E. Sell-Kubiak, J. A. M. van Arendonk, J. Visscher, and P. Bijma. 2014. The prospects of selection for social genetic effects to improve welfare and productivity



- in livestock. *Front. Genet.* 5:377. Frontiers Research Foundation.
- Fisher, D. N., S. Boutin, B. Dantzer, M. M. Humphries, J. E. Lane, and A. G. Mcadam. 2017. Multilevel and sex-specific selection on competitive traits in North American red squirrels. *Evolution (N. Y.)*, doi: 10.1111/evo.13270.
- Fisher, D. N., and A. G. McAdam. 2017. Social traits, social networks, and evolutionary biology. *J. Evol. Biol.*
- Fletcher, Q. E., M. Landry-Cuerrier, S. Boutin, A. G. McAdam, J. R. Speakman, and M. M. Humphries. 2013a. Reproductive timing and reliance on hoarded capital resources by lactating red squirrels. *Oecologia* 173:1203–1215.
- Fletcher, Q. E., C. Selman, S. Boutin, A. G. McAdam, S. B. Woods, A. Y. Seo, C. Leeuwenburgh, J. R. Speakman, and M. M. Humphries. 2013b. Oxidative damage increases with reproductive energy expenditure and is reduced by food-supplementation. *Evolution (N. Y.)*. 67:1527–1536.
- Frank, S. A. 2007. All of life is social. *Curr. Biol.* 17:R648–R650.
- Gerhardt, F. 2005. Food pilfering in larder-hoarding red squirrels (*Tamiasciurus hudsonicus*). *J. Mammal.* 86:108–114.
- Gilmour, A. R., B. J. Gogel, B. R. Cullis, S. J. Welham, and R. Thompson. 2015. ASReml User Guide Release 4.1 Structural Specification.
- Griffing, B. 1967. Selection in reference to biological groups. I. Individual and group selection applied to populations of unordered groups. *Aust. J. Biol. Sci.* 20:127–39.
- Gunn, M. R., D. A. Dawson, A. Leviston, K. Hartnup, C. S. Davis, C. Strobeck, J. Slate, and D. W. Coltman. 2005. Isolation of 18 polymorphic microsatellite loci from the North American red squirrel, *Tamiasciurus hudsonicus* (Sciuridae, Rodentia), and their cross-utility in other species. *Mol. Ecol. Notes* 5:650–653. Blackwell Science Ltd.
- Hadfield, J. D., and A. J. Wilson. 2007. Multilevel selection 3: Modeling the effects of interacting individuals as a function of group size. *Genetics* 177:667–668. *Genetics*.
- Houle, D. 1992. Comparing evolvability and variability of quantitative traits. *Genetics* 130.
- Jones, O. R., and J. Wang. 2010. COLONY: a program for parentage and sibship inference from multilocus genotype data. *Mol. Ecol. Resour.* 10:551–555.
- Kalinowski, S. T., M. L. Taper, and T. C. Marshall. 2007. Revising how the computer program CERVUS accommodates genotyping error increases success in paternity assignment. *Mol. Ecol.* 16:1099–1106.
- Kelly, D. 1994. The evolutionary ecology of mast seeding. *Trends Ecol. Evol.* 9:465–470.
- Kenward, M. G., and J. H. Roger. 1997. Small Sample Inference for Fixed Effects from Restricted Maximum Likelihood. *Biometrics* 53:983.
- Kerr, T. D., S. Boutin, J. M. LaMontagne, A. G. McAdam, and M. M. Humphries. 2007. Persistent maternal effects on juvenile survival in North American red squirrels. *Biol. Lett.* 3:289–291.
- Khaw, H. L., R. W. Ponzoni, H. Y. Yee, M. A. bin Aziz, and P. Bijma. 2016. Genetic and non-genetic indirect effects for harvest weight in the GIFT strain of Nile tilapia (*Oreochromis niloticus*). *Aquaculture* 450:154–161.
- Kirkpatrick, M. 2009. Patterns of quantitative genetic variation in multiple dimensions. *Genetica* 136:271–284. Springer Netherlands.

- Kirkpatrick, M., and R. Lande. 1989. The evolution of maternal characters. *Evolution* (N. Y). 43:485–503.
- Koch, R. M. 1972. The role of maternal effects in animal breeding: VI. Maternal effects in beef cattle. *J. Anim. Sci.* 35:1316. The American Society of Animal Science.
- Kokko, H., A. Chaturvedi, D. Croll, M. C. Fischer, F. Guillaume, S. Karrenberg, B. Kerr, G. Rolshausen, and J. Stapley. 2017. Can Evolution Supply What Ecology Demands? *Trends Ecol. Evol.* 32:187–197.
- Krause, J., D. P. Croft, and R. James. 2007. Social network theory in the behavioural sciences: potential applications. *Behav. Ecol. Sociobiol.* 62:15–27. Springer-Verlag.
- Krause, J., R. James, D. W. Franks, and D. P. Croft. 2014. *Animal Social Networks*. Oxford University Press, Oxford.
- Kruuk, L. E. B. 2004. Estimating genetic parameters in natural populations using the “animal model”. *Philos. Trans. R. Soc. Lond. B. Biol. Sci.* 359:873–90. The Royal Society.
- Lair, H. 1985. Length of Gestation in the Red Squirrel, *Tamiasciurus hudsonicus*. *J. Mammal.* 66:809–810. Oxford University Press.
- Lair, H. 1990. The calls of the red squirrel — a contextual analysis of function. *Behaviour* 115:254–282.
- LaMontagne, J. M., C. T. Williams, J. L. Donald, M. M. Humphries, A. G. McAdam, and S. Boutin. 2013. Linking intraspecific variation in territory size, cone supply, and survival of North American red squirrels. *J. Mammal.* 94:1048–1058. American Society of Mammalogists.
- Lande, R. 1979. Quantitative genetic analysis of multivariate evolution, applied to brain: body size allometry. *Evolution* (N. Y). 33:402–416.
- Lane, J. E., S. Boutin, M. R. Gunn, J. Slate, and D. W. Coltman. 2008. Female multiple mating and paternity in free-ranging North American red squirrels. *Anim. Behav.* 75:1927–1937.
- Lane, J. E., S. Boutin, M. R. Gunn, J. Slate, and D. W. Coltman. 2007. Genetic relatedness of mates does not predict patterns of parentage in North American red squirrels. *Anim. Behav.* 74:611–619.
- Lane, J., A. G. McAdam, E. McFarlane, C. Williams, M. M. Humphries, D. Coltman, J. Gorrell, and S. Boutin. 2018. Phenological shifts in North American red squirrels: disentangling the roles of phenotypic plasticity and microevolution. *J. Evol. Biol.*, doi: 10.1111/jeb.13263.
- Larivée, M. L., S. Boutin, J. R. Speakman, A. G. McAdam, and M. M. Humphries. 2010. Associations between over-winter survival and resting metabolic rate in juvenile North American red squirrels. *Funct. Ecol.* 24:597–607. Blackwell Publishing Ltd.
- Lusseau, D., K. Schneider, O. J. Boisseau, P. Haase, E. Sloaten, and S. M. Dawson. 2003. The bottlenose dolphin community of Doubtful Sound features a large proportion of long-lasting associations. *Behav. Ecol. Sociobiol.* 54:396–405.
- María, G. A., K. G. Boldman, and L. D. Van Vleck. 1993. Estimates of variances due to direct and maternal effects for growth traits of Romanov sheep. *J. Anim. Sci.* 71:845–849.
- McAdam, A. G., S. Boutin, A. K. Sykes, and M. M. Humphries. 2007. Life histories of female red squirrels and their contributions to population growth and lifetime fitness. *Ecoscience* 14:362.
- McAdam, A. G., D. Garant, and A. J. Wilson. 2014. The effects of others’ genes: maternal and other

- indirect genetic effects. P. in A. Charmantier, D. Garant, and L. E. B. Kruuk, eds. *Quantitative Genetics in the Wild*. Oxford University Press.
- Merilä, J., B. C. Sheldon, and L. E. Kruuk. 2001. Explaining stasis: microevolutionary studies in natural populations. *Genetica* 112–113:199–222.
- Moore, A. J., E. D. I. Brodie, and J. B. Wolf. 1997. Interacting phenotypes and the evolutionary process: I. Direct and indirect genetic effects of social interactions. *Evolution* (N. Y). 51:1352–1362.
- Muir, W. M. 2005. Incorporation of competitive effects in forest tree or animal breeding programs. *Genetics* 170:1247–1259.
- Muir, W. M., P. Bijma, and A. Schinckel. 2013. Multilevel selection with kin and non-kin groups, experimental results with japanese quail (*Coturnix japonica*). *Evolution* (N. Y). 67:1598–1606.
- Nakagawa, S., and H. Schielzeth. 2010. Repeatability for Gaussian and non-Gaussian data: a practical guide for biologists. *Biol. Rev.* 85:935–956.
- Nunney, L. 1985. Group selection, altruism, and structured-deme models. *Am. Nat.* 126:212–230.
- Piles, M., I. David, J. Ramon, L. Canario, O. Rafel, M. Pascual, M. Ragab, and J. P. Sánchez. 2017. Interaction of direct and social genetic effects with feeding regime in growing rabbits. *Genet. Sel. Evol.* 49:58.
- Réale, D., D. Berteaux, A. G. McAdam, and S. Boutin. 2003. Lifetime selection on heritable life-history traits in a natural population of red squirrels. *Evolution* (N. Y). 57:2416–2423.
- Regan, C. E., J. G. Pilkington, C. Bérénos, J. M. Pemberton, P. T. Smiseth, and A. J. Wilson. 2016. Accounting for female space sharing in St. Kilda Soay sheep (*Ovis aries*) results in little change in heritability estimates. *J. Evol. Biol.*, doi: 10.1111/jeb.12990.
- Sartori, C., and R. Mantovani. 2013. Indirect genetic effects and the genetic bases of social dominance: evidence from cattle. *Heredity* (Edinb). 110:3–9. Nature Publishing Group.
- Schielzeth, H. 2010. Simple means to improve the interpretability of regression coefficients. *Methods Ecol. Evol.* 1:103–113.
- Self, S. G., and K.-Y. Liang. 1987. Asymptotic Properties of Maximum Likelihood Estimators and Likelihood Ratio Tests Under Nonstandard Conditions. *J. Am. Stat. Assoc.* 82:605. Taylor & Francis, Ltd.American Statistical Association.
- Shonfield, J. 2010. Territorial defence behaviour and a test of the mechanism of kin recognition in red squirrels. University of Guelph.
- Shonfield, J., R. W. Taylor, S. Boutin, M. M. Humphries, and A. G. Mcadam. 2012. Territorial defence behaviour in red squirrels is influenced by local density. *Behaviour* 149:369–390.
- Silvertown, J. W. 1980. The evolutionary ecology of mast seeding in trees. *Biol. J. Linn. Soc.* 14:235–250.
- Siracusa, E., M. Morandini, S. Boutin, M. M. Humphries, B. Dantzer, J. E. Lane, and A. G. McAdam. 2017. Red squirrel territorial vocalizations deter intrusions by conspecific rivals. *Behaviour*, doi: 10.1163/1568539X-00003467.
- Smith, C. C. 1978. Structure and function of the vocalizations of tree squirrels (*Tamiasciurus*). *J. Mammal.* 59:793–808. The Oxford University Press.
- Stopher, K. V, C. A. Walling, A. Morris, F. E. Guinness, T. H. Clutton-Brock, J. M. Pemberton, and D. H.

- Nussey. 2012. Shared spatial effects on quantitative genetic parameters: accounting for spatial autocorrelation and home range overlap reduces estimates of heritability in wild red deer. *Evolution* 66:2411–26.
- Wade, M. J. 1976. Group selection among laboratory populations of *Tribolium*. *Proc. Natl. Acad. Sci.* 73:4604–4607.
- Williams, C. T., J. E. Lane, M. M. Humphries, A. G. McAdam, and S. Boutin. 2014. Reproductive phenology of a food-hoarding mast-seed consumer: Resource- and density-dependent benefits of early breeding in red squirrels. *Oecologia* 174:777–788. Springer Berlin Heidelberg.
- Wilson, A. 2014. Competition as a source of constraint on life history evolution in natural populations. *Heredity (Edinb)*. 112:70–8. The Genetics Society.
- Wilson, A. J., U. Gelin, M.-C. Perron, and D. Réale. 2009. Indirect genetic effects and the evolution of aggression in a vertebrate system. *Proc. R. Soc. B Biol. Sci.* 276:533–41.
- Wilson, A. J., M. B. Morrissey, M. J. Adams, C. A. Walling, F. E. Guinness, J. M. Pemberton, T. H. Clutton-Brock, and L. E. B. Kruuk. 2011. Indirect genetics effects and evolutionary constraint: An analysis of social dominance in red deer, *Cervus elaphus*. *J. Evol. Biol.* 24:772–783. Blackwell Publishing Ltd.
- Wilson, A. J., D. Réale, M. N. Clements, M. M. Morrissey, E. Postma, C. a Walling, L. E. B. Kruuk, and D. H. Nussey. 2010. An ecologist's guide to the animal model. *J. Anim. Ecol.* 79:13–26.
- Wolf, J. B., E. D. Brodie III, J. M. Cheverud, A. J. Moore, and M. J. Wade. 1998. Evolutionary consequences of indirect genetic effects. *Trends Ecol. Evol.* 13:64–69.
